# Supplementary material for: Dual function of cTAGE5 in collagen export from the endoplasmic reticulum
Source: PubMed Central journal article supplement — Mol Biol Cell. 2016 Jul 1;27(13):2008–13. doi: 10.1091/mbc.E16-03-0180 (PMC4927275; doi:10.1091/mbc.e16-03-0180), 2016-07-01
Supplement: supp_E16-03-0180v1_CombinedSupMats.pdf [file supp_E16-03-0180v1_CombinedSupMats.pdf]

# Supplemental Materials

*Molecular Biology of the Cell*

Tanabe et al.

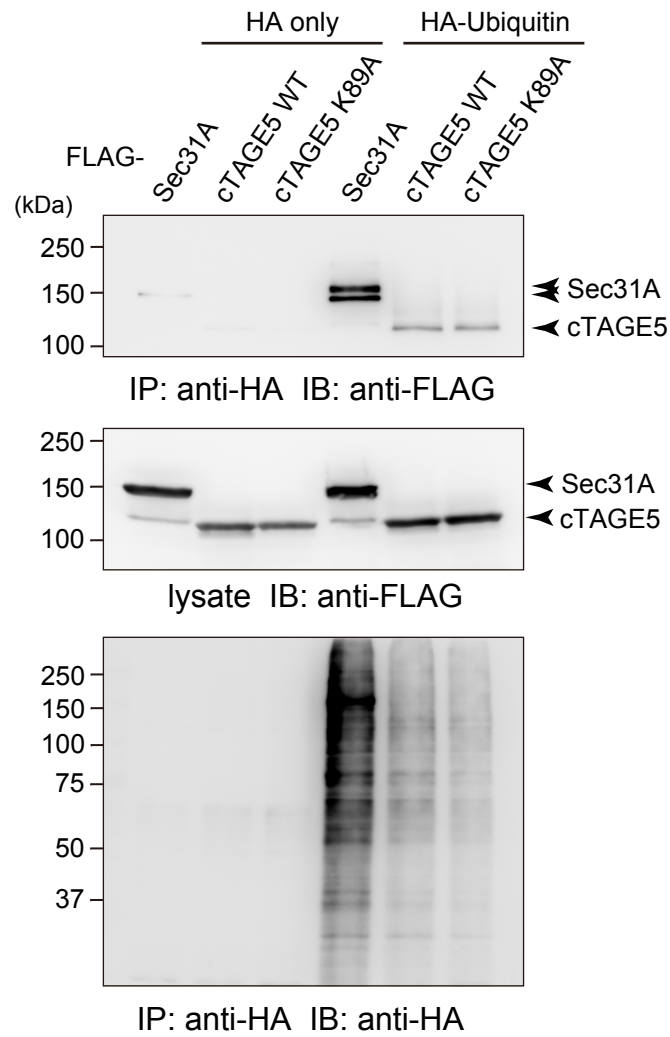

**Figure S1. cTAGE5 K89 is not crucial for ubiquitination status of cTAGE5.** 293T cells were transfected with HA only or HA-Ubiquitin with FLAG-Sec31 or cTAGE5 WT-FLAG or cTAGE5 K89A-FLAG. After 48h, cell lysates were immunoprecipitated with anti-HA antibody. Immunoprecipitants and cell lysates were analyzed by SDS-PAGE followed by western blotting with FLAG or HA antibodies.

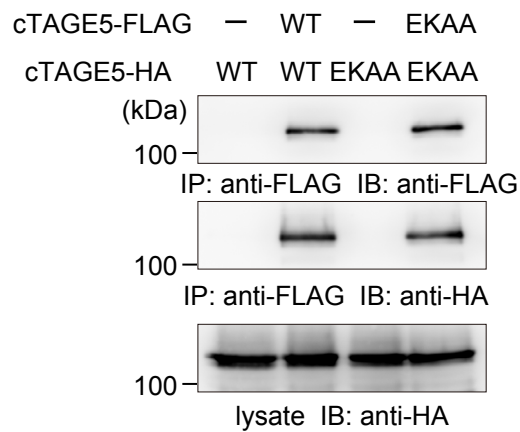

**Figure S2. cTAGE5 mutant deficient in Sec12 binding is capable of forming homodimer.** 293T cells were transfected with FLAG only, FLAG-tagged cTAGE5 wild-type or cTAGE5 E75AK76A with HA-tagged cTAGE5 wild-type or cTAGE5 E75AK76A. Cell lysates were immunoprecipitated with anti-FLAG antibody and eluted with the FLAG peptide. Eluates were subjected to SDS-PAGE followed by western blotting with anti-FLAG or anti-HA antibodies.
